# Supplementary material for: Pseudogenization of the chloroplast threonine (trnT-GGU) gene in the sunflower family (Asteraceae)
Source: PubMed Central journal article supplement (PMC8548347; doi:10.1038/s41598-021-00510-4), 2021-10-26

**Pseudogenization of the chloroplast threonine (*trnT*-GGU) gene in the sunflower family (Asteraceae)**

Abdullah<sup>1, \*</sup>, Furrukh Mehmood<sup>1</sup>, Parviz Heidari<sup>2</sup>, Abdur Rahim<sup>3</sup>, Ibrar Ahmed<sup>4</sup>, Peter Poczai<sup>\*5,6,7</sup>

<sup>1</sup>*Department of Biochemistry, Faculty of Biological Sciences, Quaid-i-Azam University, 45320 Islamabad, Pakistan*

<sup>2</sup>*Faculty of Agriculture, Shahrood University of Technology, 3619995161 Shahrood, Iran*

<sup>3</sup>*Government Degree College Nowshera, Abdul Wali Khan University Mardan, KPK, Pakistan*

<sup>4</sup>*Alpha Genomics Private Limited, 45710 Islamabad, Pakistan*

<sup>5</sup>*Finnish Museum of Natural History, P.O. Box 7, FI-00014 University of Helsinki, Finland*

<sup>6</sup>*Faculty of Biological and Environmental Sciences, PO Box 65 FI-00065 University of Helsinki, Finland*

<sup>7</sup>*Institute of Advanced Studies Kőszeg (iASK), PO Box 4, H-9731 Kőszeg, Hungary*

\* Correspondence: Abdullah ([abd.ullah@bs.qau.edu.pk](mailto:abd.ullah@bs.qau.edu.pk))

Péter Poczai ([peter.poczai@helsinki.fi](mailto:peter.poczai@helsinki.fi))

**Table S2. Accession numbers of Asteroideae species and prediction of *trnT*-GGU gene**

| S.No | Species                            | Accession | tribe       | tRNAScan Prediction          | Infernal score | Isotype |
|------|------------------------------------|-----------|-------------|------------------------------|----------------|---------|
| 1    | <i>Ismelia carinata</i>            | MG710387  | Anthemideae | Not detected                 | N/A            | N/A     |
| 2    | <i>Soliva sessilis</i>             | KX063863  | Anthemideae | Pseudo                       | 27.8           | Ile2    |
| 3    | <i>Ajania pacifica</i>             | MN883841  | Anthemideae | tRNAs with mismatch isotypes | 27.8           | Ile2    |
| 4    | <i>Artemisia maritima</i>          | MK532038  | Anthemideae | tRNAs with mismatch isotypes | 27.8           | Ile2    |
| 5    | <i>Artemisia ordosica</i>          | NC_046571 | Anthemideae | tRNAs with mismatch isotypes | 27.8           | Ile2    |
| 6    | <i>Chrysanthemum boreale</i>       | MG913594  | Anthemideae | tRNAs with mismatch isotypes | 27.8           | Ile2    |
| 7    | <i>Chrysanthemum indicum</i>       | JN867592  | Anthemideae | tRNAs with mismatch isotypes | 27.8           | Ile2    |
| 8    | <i>Crossostephium chinense</i>     | MH708560  | Anthemideae | tRNAs with mismatch isotypes | 27.8           | Ile2    |
| 9    | <i>Leucanthemum virgatum</i>       | MN996243  | Anthemideae | tRNAs with mismatch isotypes | 27.8           | Ile2    |
| 10   | <i>Neopallasia pectinata</i>       | MW007388  | Anthemideae | tRNAs with mismatch isotypes | 27.8           | Ile2    |
| 11   | <i>Opisthopappus taihangensis</i>  | MK552323  | Anthemideae | tRNAs with mismatch isotypes | 27.8           | Ile2    |
| 12   | <i>Tanacetum cinerariifolium</i>   | MT104464  | Anthemideae | tRNAs with mismatch isotypes | 27.8           | Ile2    |
| 13   | <i>Aster hersileoides</i>          | MK290823  | Astereae    | Not detected                 | N/A            | N/A     |
| 14   | <i>Aster hypoleucus</i>            | MK290824  | Astereae    | Not detected                 | N/A            | N/A     |
| 15   | <i>Blakiella bartsiiifolia</i>     | KX063886  | Astereae    | Not detected                 | N/A            | N/A     |
| 16   | <i>Conyza bonariensis</i>          | KX792499  | Astereae    | Not detected                 | N/A            | N/A     |
| 17   | <i>Erigeron breviscapus</i>        | MK279916  | Astereae    | Not detected                 | N/A            | N/A     |
| 18   | <i>Erigeron canadensis</i>         | MK737940  | Astereae    | Not detected                 | N/A            | N/A     |
| 19   | <i>Eschenbachia blinii</i>         | KX085421  | Astereae    | Not detected                 | N/A            | N/A     |
| 20   | <i>Floscaldasia hypsophila</i>     | KX063916  | Astereae    | Not detected                 | N/A            | N/A     |
| 21   | <i>Heteroplexis incana</i>         | MN172194  | Astereae    | Not detected                 | N/A            | N/A     |
| 22   | <i>Hinterhubera ericoides</i>      | KX063910  | Astereae    | Not detected                 | N/A            | N/A     |
| 23   | <i>Laestadia muscicola</i>         | KX063873  | Astereae    | Not detected                 | N/A            | N/A     |
| 24   | <i>Solidago decurrens</i>          | MT991010  | Astereae    | Not detected                 | N/A            | N/A     |
| 25   | <i>Westoniella kohkemperi</i>      | KX063921  | Astereae    | Not detected                 | N/A            | N/A     |
| 26   | <i>Exostigma notobellidiastrum</i> | KX063881  | Astereae    | Not detected                 | N/A            | N/A     |
| 27   | <i>Archibaccharis asperifolia</i>  | KX063859  | Astereae    | Pseudo                       | 15.3           | Lys     |
| 28   | <i>Aztecaster matudae</i>          | KX063935  | Astereae    | Thr                          | 22.6           | N/A     |
| 29   | <i>Baccharis aliena</i>            | KX063869  | Astereae    | Thr                          | 22.6           | N/A     |
| 30   | <i>Baccharis genistelloides</i>    | KX063864  | Astereae    | Thr                          | 22.6           | N/A     |

|    |                                                  |            |             |                              |      |      |
|----|--------------------------------------------------|------------|-------------|------------------------------|------|------|
| 31 | <i>Diplostephium azureum</i>                     | KX063907   | Astereae    | Thr                          | 22.6 | N/A  |
| 32 | <i>Diplostephium barclayanum</i>                 | KX063865   | Astereae    | Thr                          | 22.6 | N/A  |
| 33 | <i>Laennecia sophiifolia</i>                     | KX063899   | Astereae    | Thr                          | 22.6 | N/A  |
| 34 | <i>Lagenophora cuchumatana</i>                   | KX063879   | Astereae    | Thr                          | 22.6 | N/A  |
| 35 | <i>Parastrephia quadrangularis</i>               | KX063923   | Astereae    | Thr                          | 22.6 | N/A  |
| 36 | <i>Piofontia alveolata</i>                       | KX063856   | Astereae    | Thr                          | 22.6 | N/A  |
| 37 | <i>Piofontia antioquensis</i>                    | KX063898   | Astereae    | Thr                          | 22.6 | N/A  |
| 38 | <i>Symphyotrichum subulatum</i>                  | NC_050667  | Astereae    | Thr                          | 22.6 | N/A  |
| 39 | <i>Llerasia caucana</i>                          | KX063908   | Astereae    | tRNAs with mismatch isotypes | 27.8 | Ile2 |
| 40 | <i>Nannoglottis ravida</i>                       | MT767106   | Astereae    | tRNAs with mismatch isotypes | 27.8 | Ile2 |
| 41 | <i>Oritrophium peruvianum</i>                    | KX063861   | Astereae    | tRNAs with mismatch isotypes | 27.8 | Ile2 |
| 42 | <i>Chrysanthemoides incana</i>                   | This study | Calenduleae | tRNAs with mismatch isotypes | 27.8 | Ile2 |
| 43 | <i>Bidens amplexans</i>                          | MN433103   | Coreopsidae | Not detected                 | N/A  | N/A  |
| 44 | <i>Bidens torta</i>                              | NC_047275  | Coreopsidae | Not detected                 | N/A  | N/A  |
| 45 | <i>Cosmos bipinnatus</i>                         | MN518845   | Coreopsidae | Not detected                 | N/A  | N/A  |
| 46 | <i>Ageratum conyzoides</i>                       | MK905238   | Eupatorieae | Not detected                 | N/A  | N/A  |
| 47 | <i>Dimerostemma asperatum</i>                    | MT700540   | Eupatorieae | Not detected                 | N/A  | N/A  |
| 48 | <i>Iostephane heterophylla</i>                   | MT700542   | Eupatorieae | Not detected                 | N/A  | N/A  |
| 49 | <i>Mikania micrantha</i>                         | KX154571   | Eupatorieae | Not detected                 | N/A  | N/A  |
| 50 | <i>Praxelis clematidea</i>                       | KF922320   | Eupatorieae | Not detected                 | N/A  | N/A  |
| 51 | <i>Ageratina adenophora</i>                      | JF826503   | Eupatorieae | Pseudo                       | N/A  | N/A  |
| 52 | <i>Chromolaena odorata</i>                       | NC_050055  | Eupatorieae | Pseudo                       | 20.9 | N/A  |
| 53 | <i>Pappobolus lanatus</i> var.<br><i>lanatus</i> | MT700543   | Eupatorieae | Pseudo                       | 21.8 | N/A  |
| 54 | <i>Anaphalis sinica</i>                          | KX148081   | Gnaphalieae | Not detected                 | N/A  | N/A  |
| 55 | <i>Helichrysum italicum</i>                      | NC_041458  | Gnaphalieae | Not detected                 | N/A  | N/A  |
| 56 | <i>Leontopodium leiolepis</i>                    | KM267636   | Gnaphalieae | Not detected                 | N/A  | N/A  |
| 57 | <i>Marshallia caespitosa</i>                     | MH037175   | Helenieae   | Not detected                 | N/A  | N/A  |
| 58 | <i>Marshallia grandiflora</i>                    | MH037177   | Helenieae   | Not detected                 | N/A  | N/A  |
| 59 | <i>Aldama anchusifolia</i>                       | MN337902   | Heliantheae | Not detected                 | N/A  | N/A  |
| 60 | <i>Ambrosia artemisiifolia</i>                   | MF362689   | Heliantheae | Not detected                 | N/A  | N/A  |
| 61 | <i>Ambrosia trifida</i>                          | MG029118   | Heliantheae | Not detected                 | N/A  | N/A  |
| 62 | <i>Eclipta alba</i>                              | MF993496   | Heliantheae | Not detected                 | N/A  | N/A  |

|    |                                      |           |             |                                                       |      |     |
|----|--------------------------------------|-----------|-------------|-------------------------------------------------------|------|-----|
| 63 | <i>Eclipta prostrata</i>             | KU361242  | Heliantheae | Not detected                                          | N/A  | N/A |
| 64 | <i>Parthenium hysterophorus</i>      | MT576959  | Heliantheae | Not detected                                          | N/A  | N/A |
| 65 | <i>Rudbeckia laciniata</i>           | MN518844  | Heliantheae | Not detected                                          | N/A  | N/A |
| 66 | <i>Sphagneticola calendulacea</i>    | KY828438  | Heliantheae | Not detected                                          | N/A  | N/A |
| 67 | <i>Sphagneticola trilobata</i>       | KY940274  | Heliantheae | Not detected                                          | N/A  | N/A |
| 68 | <i>Xanthium sibiricum</i>            | MH473582  | Heliantheae | Not detected                                          | N/A  | N/A |
| 69 | <i>Echinacea purpurea</i>            | KX548224  | Heliantheae | Pseudo                                                | 20.9 | N/A |
| 70 | <i>Echinacea tennesseensis</i>       | KX548223  | Heliantheae | pseudo                                                | 20.9 | N/A |
| 71 | <i>Helianthus annuus</i>             | DQ383815  | Heliantheae | Pseudo                                                | 21.8 | N/A |
| 72 | <i>Helianthus argophyllus</i>        | KU314500  | Heliantheae | Pseudo                                                | 21.8 | N/A |
| 73 | <i>Tithonia diversifolia</i>         | MT576958  | Heliantheae | Pseudo                                                | 20.9 | N/A |
| 74 | <i>Pluchea indica</i>                | NC_038194 | Inuleae     | tRNAs with mismatch isotypes; truncated start and end | 23   | Lys |
| 75 | <i>Achyrachaena mollis</i>           | MF663009  | Madieae     | Not detected                                          | N/A  | N/A |
| 76 | <i>Eriophyllum lanatum</i>           | MH183145  | Madieae     | Not detected                                          | N/A  | N/A |
| 77 | <i>Lasthenia burkei</i>              | KM360047  | Madieae     | Not detected                                          | N/A  | N/A |
| 78 | <i>Lasthenia californica</i>         | KY965816  | Madieae     | Not detected                                          | N/A  | N/A |
| 79 | <i>Galinsoga parviflora</i>          | MK737938  | Millerieae  | Not detected                                          | N/A  | N/A |
| 80 | <i>Galinsoga quadriradiata</i>       | KX752097  | Millerieae  | Not detected                                          | N/A  | N/A |
| 81 | <i>Guizotia abyssinica</i>           | EU549769  | Millerieae  | Not detected                                          | N/A  | N/A |
| 82 | <i>Sigesbeckia orientalis</i>        | MN240004  | Millerieae  | Not detected                                          | N/A  | N/A |
| 83 | <i>Dendrosenecio brassiciformis</i>  | MG560051  | Senecioneae | Not detected                                          | N/A  | N/A |
| 84 | <i>Dendrosenecio cheranganiensis</i> | MG560046  | Senecioneae | Not detected                                          | N/A  | N/A |
| 85 | <i>Farfugium japonicum</i>           | MT929248  | Senecioneae | Not detected                                          | N/A  | N/A |
| 86 | <i>Gynoxys asterotricha</i>          | MK044798  | Senecioneae | Not detected                                          | N/A  | N/A |
| 87 | <i>Gynoxys mandonii</i>              | MK056106  | Senecioneae | Not detected                                          | N/A  | N/A |
| 88 | <i>Jacobaea vulgaris</i>             | HQ234669  | Senecioneae | Not detected                                          | N/A  | N/A |
| 89 | <i>Ligularia fischeri</i>            | KT988070  | Senecioneae | Not detected                                          | N/A  | N/A |
| 90 | <i>Ligularia mongolica</i>           | NC_039384 | Senecioneae | Not detected                                          | N/A  | N/A |
| 91 | <i>Nordenstamia repanda</i>          | MK086040  | Senecioneae | Not detected                                          | N/A  | N/A |
| 92 | <i>Pericallis hybrida</i>            | KT285537  | Senecioneae | Not detected                                          | N/A  | N/A |
| 93 | <i>Petasites japonicus</i>           | MN385243  | Senecioneae | Not detected                                          | N/A  | N/A |

|    |                            |          |             |              |     |     |
|----|----------------------------|----------|-------------|--------------|-----|-----|
| 94 | <i>Senecio keniophytum</i> | MH483946 | Senecioneae | Not detected | N/A | N/A |
| 95 | <i>Senecio vulgaris</i>    | MK654722 | Senecioneae | Not detected | N/A | N/A |
| 96 | <i>Flaveria bidentis</i>   | MK836182 | Tageteae    | Not detected | N/A | N/A |
| 97 | <i>Tagetes erecta</i>      | MN203535 | Tageteae    | Not detected | N/A | N/A |

**Table S3. Accession numbers of species of Carduoideae and prediction of *trnT*-GGU gene**

| S.No | Species                       | Accession | tRNAScan Prediction | Infernal score | Isotype | Anticodon |
|------|-------------------------------|-----------|---------------------|----------------|---------|-----------|
| 1    | <i>Arctium lappa</i>          | NC_042724 | Thr                 | 55.7           | Thr     | CGU       |
| 2    | <i>Atractylodes chinensis</i> | NC_037484 | Thr                 | 57.1           | Thr     | GGU       |
| 3    | <i>Carduus acanthoides</i>    | MK652228  | Thr                 | 57             | Thr     | CGU       |
| 4    | <i>Carthamus tinctorius</i>   | MK983238  | Thr                 | 57             | Thr     | CGU       |
| 5    | <i>Centaurea diffusa</i>      | KJ690264  | Thr                 | 57             | Thr     | CGU       |
| 6    | <i>Cirsium japonicum</i>      | MW035606  | Thr                 | 57             | Thr     | CGU       |
| 7    | <i>Cynara cardunculus</i>     | KP842720  | Thr                 | 57             | Thr     | CGU       |
| 8    | <i>Dolomiaea calophylla</i>   | MT128668  | Thr                 | 57             | Thr     | CGU       |
| 9    | <i>Saussurea inversa</i>      | MT554929  | Thr                 | 57             | Thr     | CGU       |
| 10   | <i>Silybum marianum</i>       | KT267161  | Thr                 | 57             | Thr     | CGU       |
| 11   | <i>Synurus deltooides</i>     | NC_046830 | Thr                 | 57             | Thr     | CGU       |

**Table S4. Accession numbers of Cichorioideae species and prediction of *trnT-GGU* gene**

| <b>S.No</b> | <b>Species</b>                   | <b>Accession</b> | <b>tRNAScan Prediction</b>                                      | <b>Infernal score</b> | <b>Isotype</b> |
|-------------|----------------------------------|------------------|-----------------------------------------------------------------|-----------------------|----------------|
| 1           | <i>Cichorium intybus</i>         | MK569377         | Thr                                                             | 34.6                  | Thr            |
| 2           | <i>Crepidiastrum lanceolatum</i> | MK358413         | Thr                                                             | 34.6                  | Thr            |
| 3           | <i>Dendroseris berteroaana</i>   | MK371014         | Thr                                                             | 34.6                  | Thr            |
| 4           | <i>Gymnanthemum amygdalinum</i>  | MT795180         | Thr                                                             | 33.7                  | Thr            |
| 5           | <i>Hypochaeris radicata</i>      | MH746729         | tRNAs with mismatch isotypes, truncated start and truncated end | 20.2                  | Lys            |
| 6           | <i>Lactuca raddeana</i>          | MN402448         | Pseudo                                                          | 29.3                  | Thr            |
| 7           | <i>Lapsanastrum humile</i>       | MK358416         | Thr                                                             | 31                    | Thr            |
| 8           | <i>Reichardia ligulata</i>       | MN893255         | Thr                                                             | 39.6                  | Thr            |
| 9           | <i>Sonchus webbii</i>            | MK033508         | Thr                                                             | 34.6                  | Thr            |
| 10          | <i>Stebbinsia umbrella</i>       | MN822134         | Not detected                                                    |                       | Thr            |
| 11          | <i>Taraxacum amplum</i>          | KX499525         | Thr                                                             | 34.6                  | Thr            |
| 12          | <i>Youngia japonica</i>          | MK358417         | Thr                                                             | 31                    | Thr            |
| 13          | <i>Ixeris polycephala</i>        | MK358415         | Not detected                                                    | N/A                   | N/A            |

**Table S5. Codon usage comparison among the species with functional and non-functional *trnT*-GGU gene**

| Codon | Amio acid | Number of codons          |                           |                                 |                          |                             |
|-------|-----------|---------------------------|---------------------------|---------------------------------|--------------------------|-----------------------------|
|       |           | <i>Artemisia ordosica</i> | <i>Aster hersileoides</i> | <i>Symphyotrichum subulatum</i> | <i>Helianthus annuus</i> | <i>Barnadesia lehmannii</i> |
| GCA   | A         | 410                       | 408                       | 407                             | 415                      | 407                         |
| GCC   | A         | 229                       | 235                       | 237                             | 233                      | 246                         |
| GCG   | A         | 152                       | 160                       | 161                             | 156                      | 158                         |
| GCT   | A         | 615                       | 626                       | 619                             | 625                      | 631                         |
| TGC   | C         | 87                        | 87                        | 85                              | 79                       | 83                          |
| TGT   | C         | 202                       | 208                       | 209                             | 206                      | 215                         |
| GAC   | D         | 213                       | 212                       | 210                             | 218                      | 218                         |
| GAT   | D         | 857                       | 855                       | 851                             | 836                      | 856                         |
| GAA   | E         | 986                       | 981                       | 986                             | 989                      | 998                         |
| GAG   | E         | 343                       | 354                       | 354                             | 342                      | 374                         |
| TTC   | F         | 499                       | 517                       | 521                             | 510                      | 535                         |
| TTT   | F         | 980                       | 982                       | 976                             | 953                      | 979                         |
| GGA   | G         | 697                       | 691                       | 694                             | 699                      | 701                         |
| GGC   | G         | 190                       | 198                       | 197                             | 188                      | 201                         |
| GGG   | G         | 303                       | 324                       | 321                             | 296                      | 306                         |
| GGT   | G         | 582                       | 574                       | 576                             | 583                      | 594                         |
| CAC   | H         | 146                       | 155                       | 154                             | 148                      | 142                         |
| CAT   | H         | 470                       | 457                       | 457                             | 456                      | 481                         |
| ATA   | I         | 690                       | 691                       | 679                             | 686                      | 685                         |
| ATC   | I         | 434                       | 425                       | 427                             | 453                      | 441                         |
| ATT   | I         | 1075                      | 1081                      | 1082                            | 1047                     | 1079                        |
| AAA   | K         | 1030                      | 1035                      | 1053                            | 1015                     | 1059                        |
| AAG   | K         | 363                       | 368                       | 370                             | 368                      | 362                         |
| CTA   | L         | 361                       | 377                       | 380                             | 384                      | 386                         |
| CTC   | L         | 194                       | 191                       | 190                             | 188                      | 201                         |
| CTG   | L         | 189                       | 182                       | 183                             | 171                      | 178                         |
| CTT   | L         | 622                       | 612                       | 607                             | 603                      | 606                         |
| TTA   | L         | 882                       | 865                       | 865                             | 854                      | 849                         |
| TTG   | L         | 576                       | 580                       | 580                             | 580                      | 598                         |
| ATG   | M         | 622                       | 635                       | 629                             | 625                      | 622                         |
| AAC   | N         | 283                       | 291                       | 284                             | 281                      | 278                         |

|     |   |      |     |     |     |      |
|-----|---|------|-----|-----|-----|------|
| AAT | N | 1008 | 979 | 975 | 984 | 1000 |
| CCA | P | 325  | 319 | 324 | 318 | 312  |
| CCC | P | 187  | 210 | 205 | 203 | 203  |
| CCG | P | 160  | 165 | 165 | 166 | 179  |
| CCT | P | 441  | 410 | 410 | 417 | 408  |
| CAA | Q | 733  | 729 | 726 | 699 | 714  |
| CAG | Q | 233  | 222 | 222 | 227 | 220  |
| AGA | R | 482  | 499 | 492 | 484 | 491  |
| AGG | R | 170  | 174 | 169 | 169 | 187  |
| CGA | R | 341  | 347 | 354 | 344 | 339  |
| CGC | R | 104  | 109 | 112 | 100 | 105  |
| CGG | R | 122  | 115 | 110 | 119 | 136  |
| CGT | R | 348  | 351 | 347 | 349 | 349  |
| AGC | S | 122  | 119 | 117 | 113 | 115  |
| AGT | S | 414  | 403 | 405 | 399 | 407  |
| TCA | S | 413  | 409 | 406 | 404 | 403  |
| TCC | S | 323  | 310 | 306 | 302 | 326  |
| TCG | S | 163  | 167 | 168 | 158 | 191  |
| TCT | S | 583  | 592 | 592 | 580 | 594  |
| ACA | T | 412  | 405 | 399 | 400 | 400  |
| ACC | T | 241  | 240 | 237 | 236 | 247  |
| ACG | T | 124  | 141 | 142 | 135 | 138  |
| ACT | T | 527  | 530 | 536 | 519 | 537  |
| GTA | V | 537  | 525 | 521 | 515 | 534  |
| GTC | V | 174  | 178 | 177 | 187 | 184  |
| GTG | V | 187  | 192 | 189 | 187 | 209  |
| GTT | V | 508  | 510 | 514 | 500 | 506  |
| TGG | W | 458  | 461 | 457 | 447 | 470  |
| TAC | Y | 182  | 176 | 180 | 182 | 182  |
| TAT | Y | 800  | 800 | 796 | 789 | 805  |
| TAA | * | 51   | 50  | 51  | 52  | 47   |
| TAG | * | 21   | 21  | 21  | 19  | 23   |
| TGA | * | 15   | 15  | 15  | 16  | 16   |



Table S6. The accession numbers of the species of *Artemisia*, *Aldama*, and *Diplostephium*

| Serial number | Species                                          | Accession number |
|---------------|--------------------------------------------------|------------------|
| 1             | <i>Artemisia absinthium</i>                      | MK188885         |
| 2             | <i>Artemisia annua</i>                           | MF623173         |
| 3             | <i>Artemisia argyi</i>                           | NC_030785        |
| 4             | <i>Artemisia argyrophylla</i>                    | MF034022         |
| 5             | <i>Artemisia capillaris</i>                      | NC_031400        |
| 6             | <i>Artemisia feddei</i>                          | MG951486         |
| 7             | <i>Artemisia freyniana</i> f.<br><i>discolor</i> | MG951487         |
| 8             | <i>Artemisia frigida</i>                         | JX293720         |
| 9             | <i>Artemisia fukudo</i>                          | MK569048         |
| 10            | <i>Artemisia gmelinii</i>                        | KU736962         |
| 11            | <i>Artemisia hallaisanensis</i>                  | NC_031399        |
| 12            | <i>Artemisia japonica</i>                        | KY073390         |
| 13            | <i>Artemisia maritima</i>                        | MK532038         |
| 14            | <i>Artemisia montana</i>                         | KF887960         |
| 15            | <i>Artemisia nakaii</i>                          | NC_02591         |
| 16            | <i>Artemisia ordosica</i>                        | MN932370         |
| 17            | <i>Artemisia princeps</i>                        | MF034021         |
| 18            | <i>Artemisia rubripes</i>                        | MG951496         |
| 19            | <i>Artemisia scoparia</i>                        | MN385624         |
| 20            | <i>Artemisia selengensis</i>                     | MH042532         |
| 21            | <i>Artemisia sieversiana</i>                     | MG951499         |
| 22            | <i>Artemisia stolonifera</i>                     | MG951500         |
| 23            | <i>Aldama anchusifolia</i>                       | MN337902         |
| 24            | <i>Aldama arenaria</i>                           | MN337903         |
| 25            | <i>Aldama aspilioides</i>                        | MN337905         |
| 26            | <i>Aldama bakeriana</i>                          | MN337906         |
| 27            | <i>Aldama bracteata</i>                          | MN337907         |
| 28            | <i>Aldama canescens</i>                          | MN337908         |
| 29            | <i>Aldama corumbensis</i>                        | MN337909         |
| 30            | <i>Aldama dentata</i>                            | MN337910         |
| 31            | <i>Aldama filifolia</i>                          | MN337890         |
| 32            | <i>Aldama fusiformis</i>                         | MN337891         |
| 33            | <i>Aldama gardneri</i>                           | MN337892         |
| 34            | <i>Aldama goyazii</i>                            | MN337893         |
| 35            | <i>Aldama grandiflora</i>                        | MN337894         |
| 36            | <i>Aldama kunthiana</i>                          | MN337895         |
| 37            | <i>Aldama linearis</i>                           | MN337896         |
| 38            | <i>Aldama macrorhiza</i>                         | MN337897         |
| 39            | <i>Aldama megapotamica</i>                       | MN337898         |
| 40            | <i>Aldama nudibasilaris</i>                      | MN337899         |
| 41            | <i>Aldama nudicaulis</i>                         | MN337900         |

|    |                                       |          |
|----|---------------------------------------|----------|
| 42 | <i>Aldama pilosa</i>                  | MN337901 |
| 43 | <i>Aldama trichophylla</i>            | MN337911 |
| 44 | <i>Diplostephium azureum</i>          | KX063907 |
| 45 | <i>Diplostephium barclayanum</i>      | KX063865 |
| 46 | <i>Diplostephium cajamarquillense</i> | KX063894 |
| 47 | <i>Diplostephium callilepis</i>       | KX063870 |
| 48 | <i>Diplostephium cinereum</i>         | KX063889 |
| 49 | <i>Diplostephium crypterophyllum</i>  | KX063905 |
| 50 | <i>Diplostephium empetrifolium</i>    | KX063925 |
| 51 | <i>Diplostephium ericoides</i>        | KX063892 |
| 52 | <i>Diplostephium espinosae</i>        | KX063903 |
| 53 | <i>Diplostephium foliosissimum</i>    | KX063909 |
| 54 | <i>Diplostephium gnidioides</i>       | KX063887 |
| 55 | <i>Diplostephium goodspeedii</i>      | KX063940 |
| 56 | <i>Diplostephium haenkei</i>          | KX063893 |
| 57 | <i>Diplostephium hartwegii</i>        | KX063880 |
| 58 | <i>Diplostephium hippophae</i>        | KX063944 |
| 59 | <i>Diplostephium jelskii</i>          | KX063860 |
| 60 | <i>Diplostephium juniperinum</i>      | KX063883 |
| 61 | <i>Diplostephium lechleri</i>         | KX063868 |
| 62 | <i>Diplostephium meyenii</i>          | KX063919 |
| 63 | <i>Diplostephium oblanceolatum</i>    | KX063941 |
| 64 | <i>Diplostephium oxapampanum</i>      | KX063884 |
| 65 | <i>Diplostephium pulchrum</i>         | KX063857 |
| 66 | <i>Diplostephium sagasteguii</i>      | KX063932 |
| 67 | <i>Diplostephium serratifolium</i>    | KX063924 |
| 68 | <i>Diplostephium spinulosum</i>       | KX063917 |

**Figure S1. Structure of *trnT*-GGU gene of species of 13 subfamilies.** One species was taken from each subfamily. The *trnT*-GGU gene of *Barnadesia lehmannii* is labeled to show the functional parts as representative of all species. The insertion occurred in the species of four subfamilies of core Asteraceae (Gymnarrhenoideae, Cichorioideae, Corymbioideae, and Asteroideae), which also correspond to mismatches above the anticodon loop. The insertion is highlighted with a box.

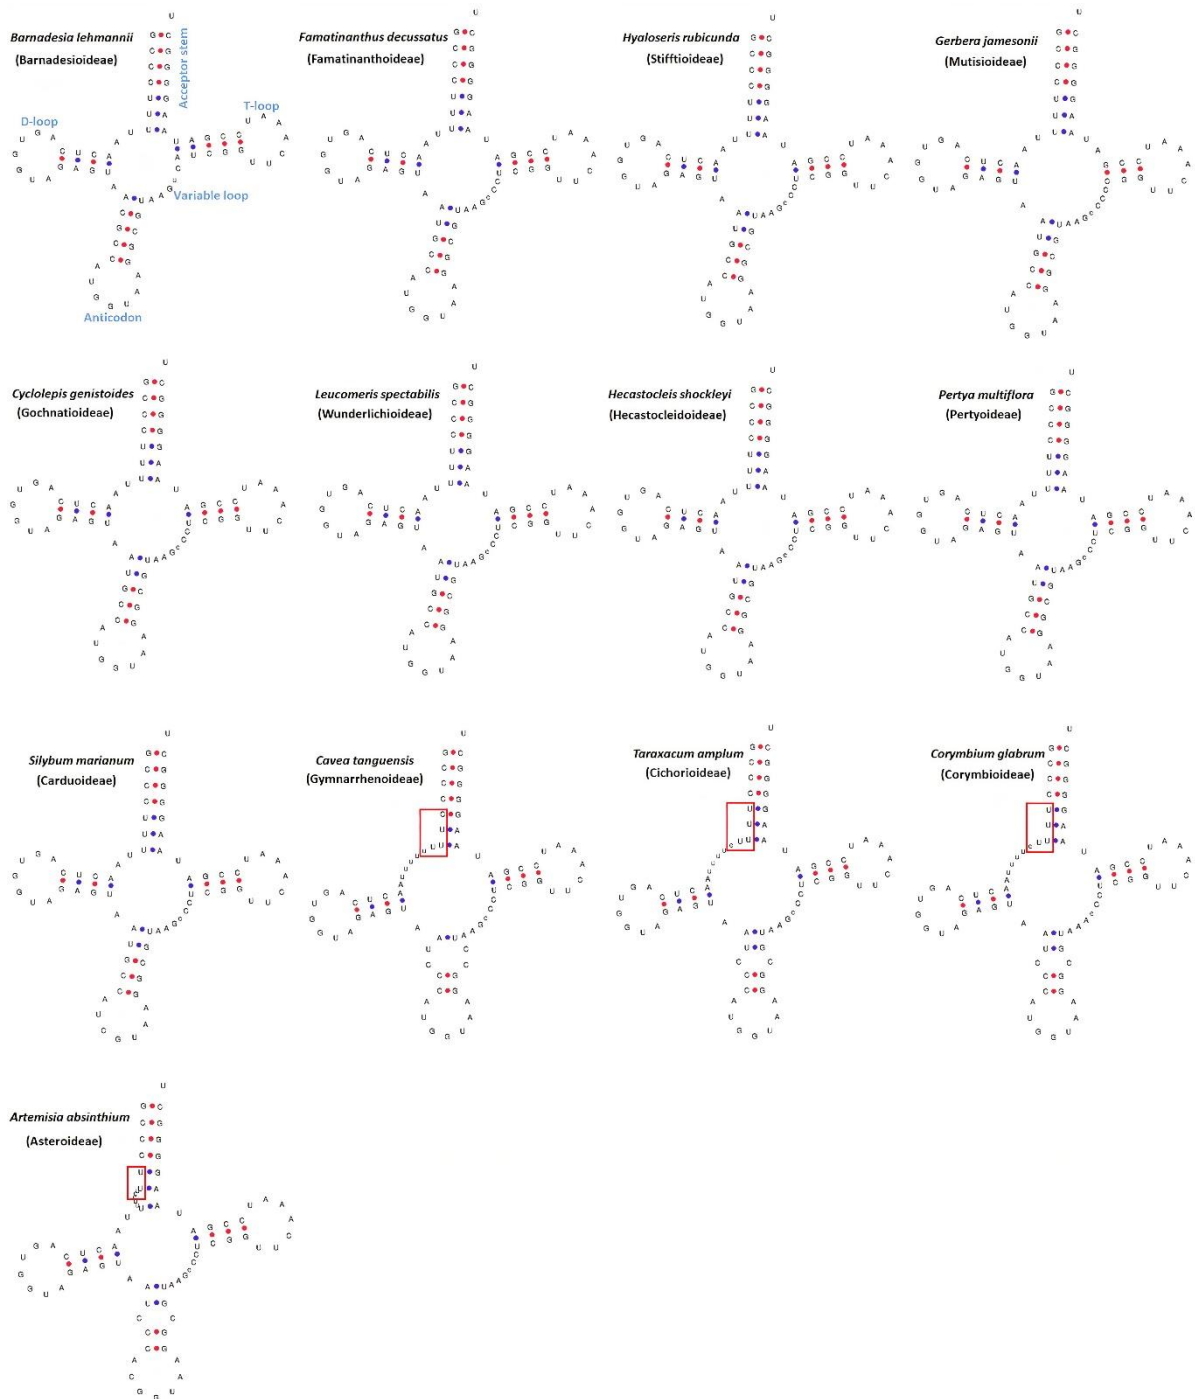

**Figure S2.** Multiple alignment of *trnT*-GGU gene among the species of the subfamily Carduoideae. The sequence of *Silybum marianum* used as reference.

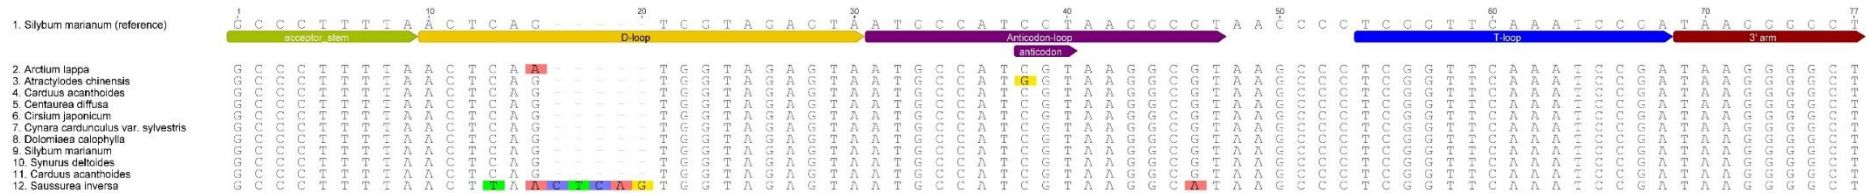

**Figure S3.** Multiple alignment of *trnT*-GGU gene among the species of the subfamily Cichorioideae. The sequence of *Silybum marianum* used as reference.

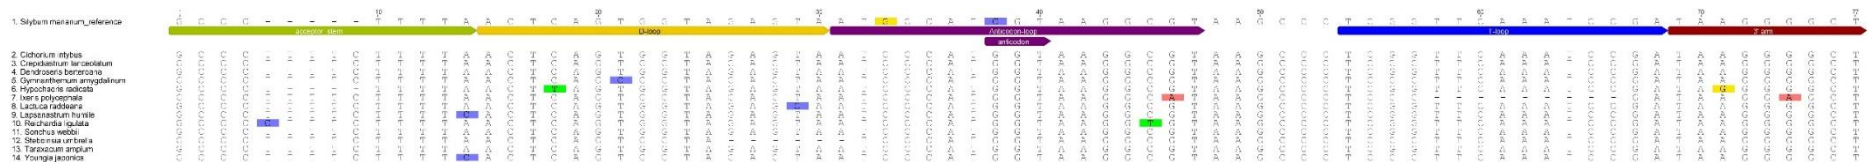



**Figure S4.** Multiple alignment of *trnT*-GGU gene among the species of the subfamily Asteroideae. The sequence of *Silybum marianum* used as reference.

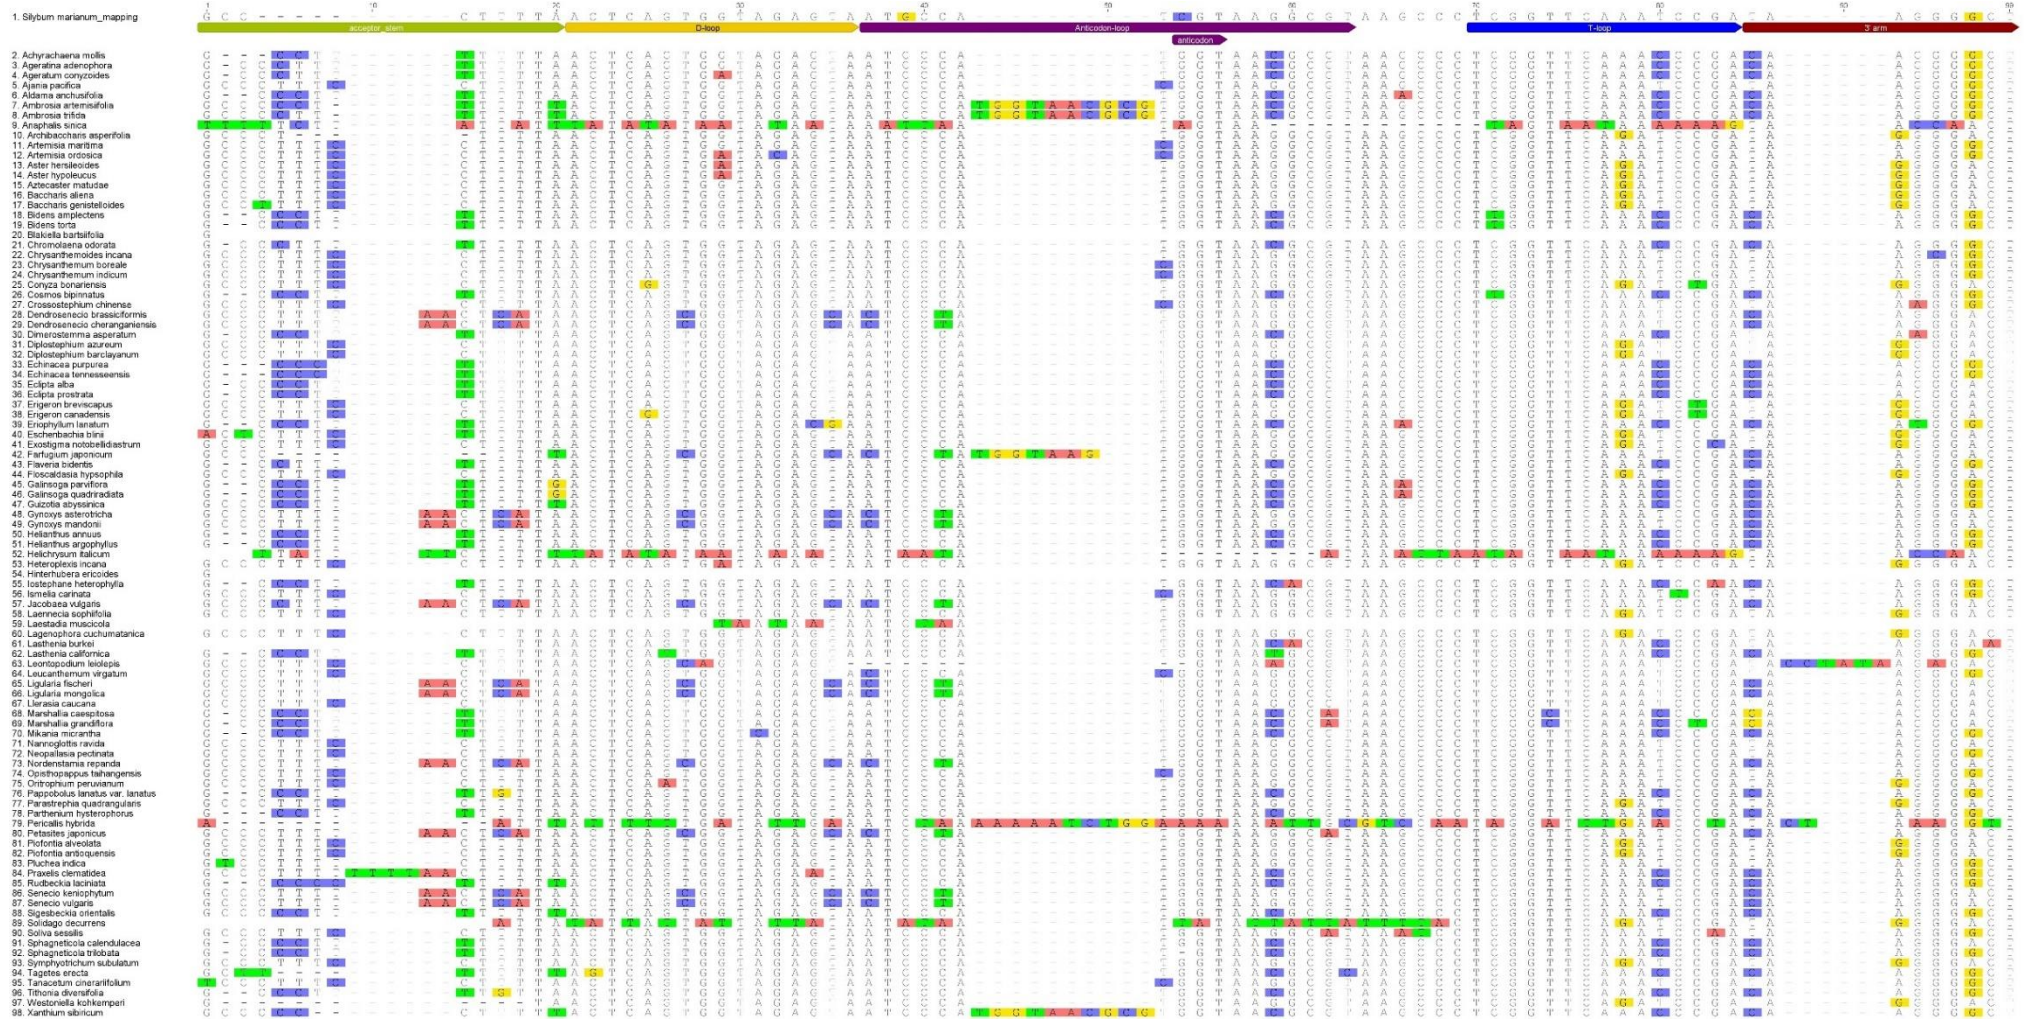



**Figure S5.** Multiple alignment of *trnT-GGU* gene among the species of the species of *Artemisia*. The sequence of *Silybum marianum* used as reference.

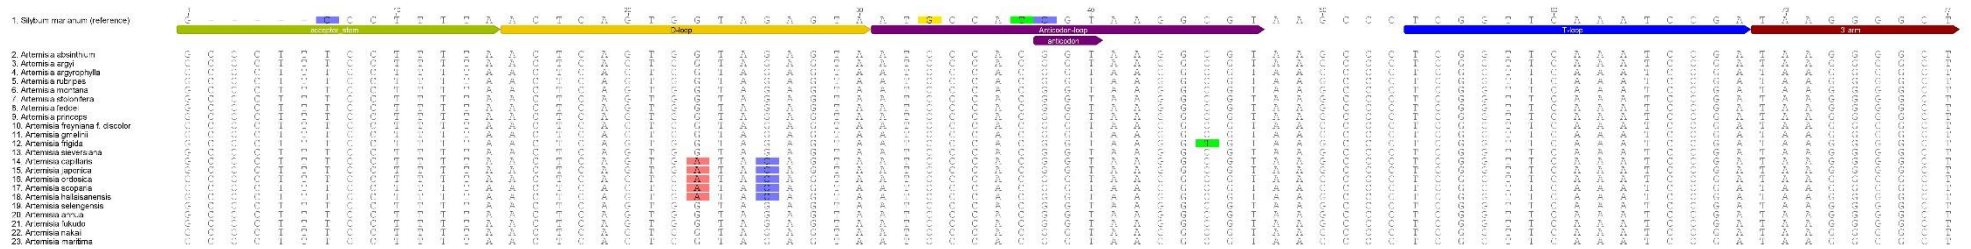

**Figure S6.** Multiple alignment of *trnT-GGU* gene among the species of the species of *Aldama*. The sequence of *Silybum marianum* used as reference.

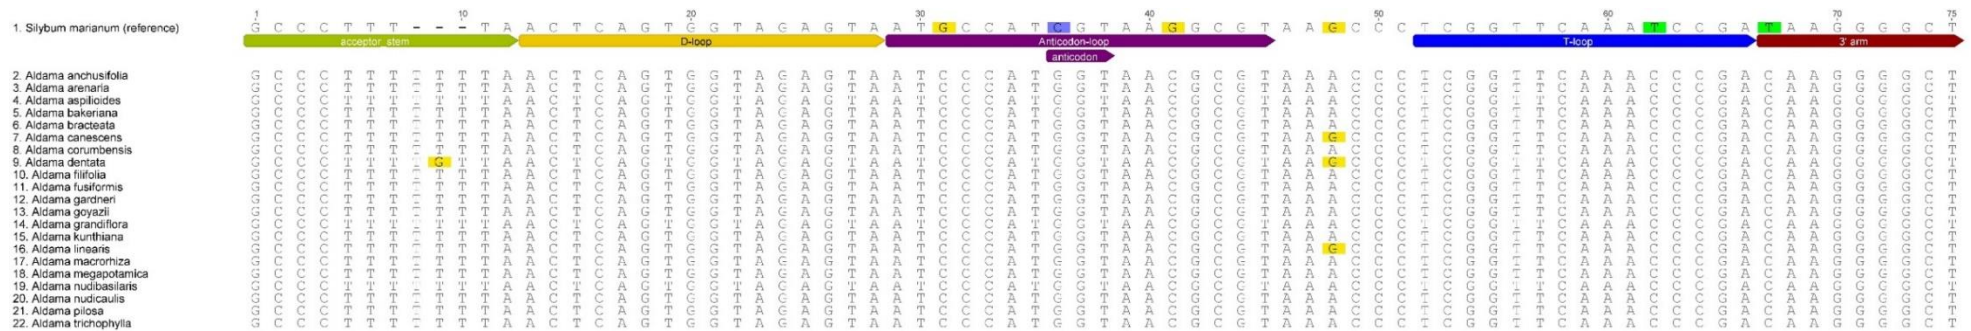

**Figure S7.** Multiple alignment of *trnT-GGU* gene among the species of the species of *Diplostephium*. The sequence of *Silybum marianum* used as reference.

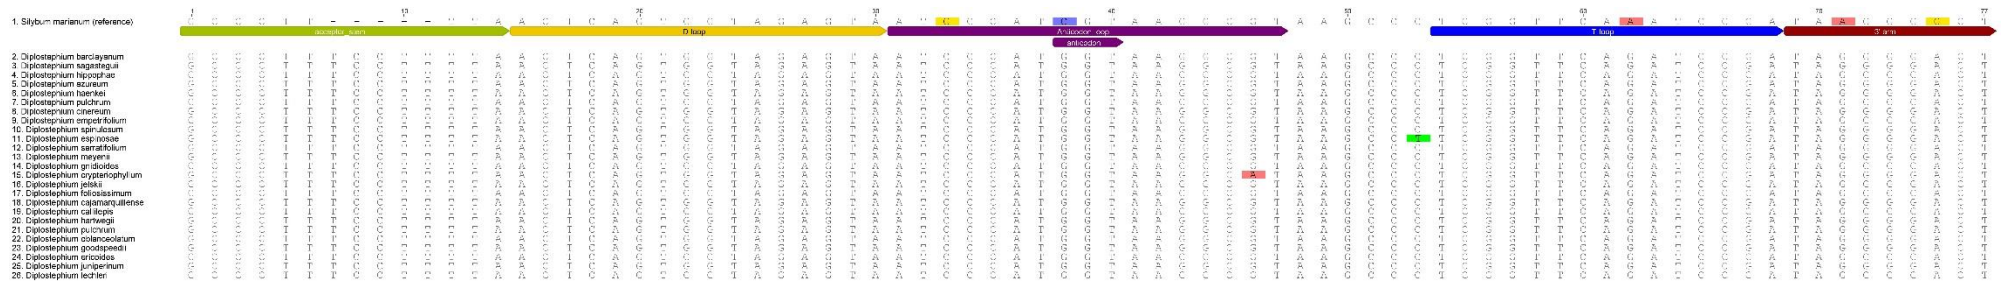

Supplement: 41598_2021_510_MOESM1_ESM.pdf [file 41598_2021_510_MOESM1_ESM.pdf]
